# Supplementary material for: Efficient and selective green oxidation of alcohols by MOF-derived magnetic nanoparticles as a recoverable catalyst
Source: Royal Society of Chemistry journal article supplement (doi:10.1039/c6ra01617k), 2016-01-01
Supplement: c6ra01617k1.pdf [file c6ra01617k1.pdf]

## Supplementary Information

### **Efficient and selective green oxidation of alcohols by MOF-derived magnetic nanoparticles as recoverable catalyst**

Xianfang Yao, Cuihua Bai, Junying Chen,\* Yingwei Li\*

State Key Laboratory of Pulp and Paper Engineering, School of Chemistry and Chemical Engineering, South China University of Technology, Guangzhou 510640, China.

E-mail: cejychen@scut.edu.cn, liyw@scut.edu.cn

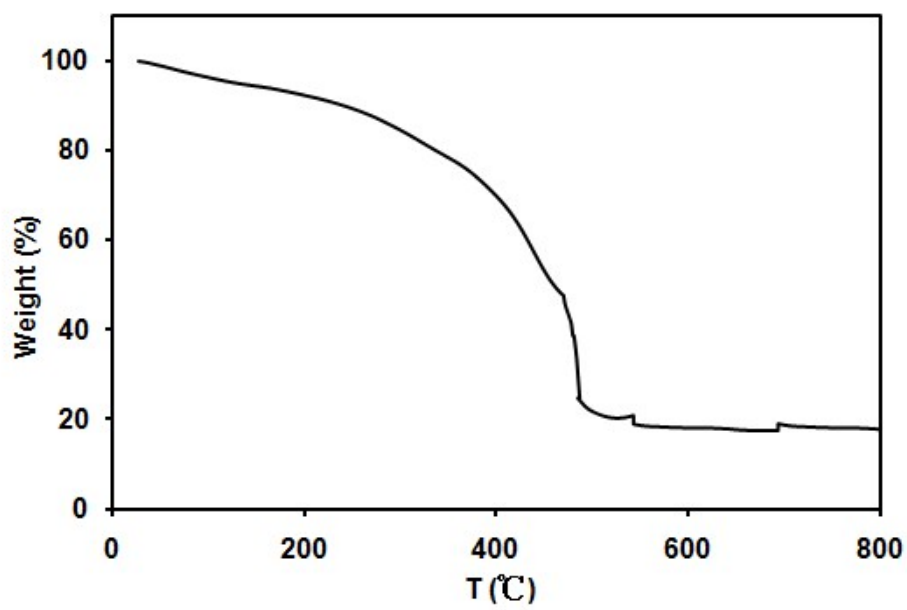

**Fig. S1** TGA curve of the MIL-88B.

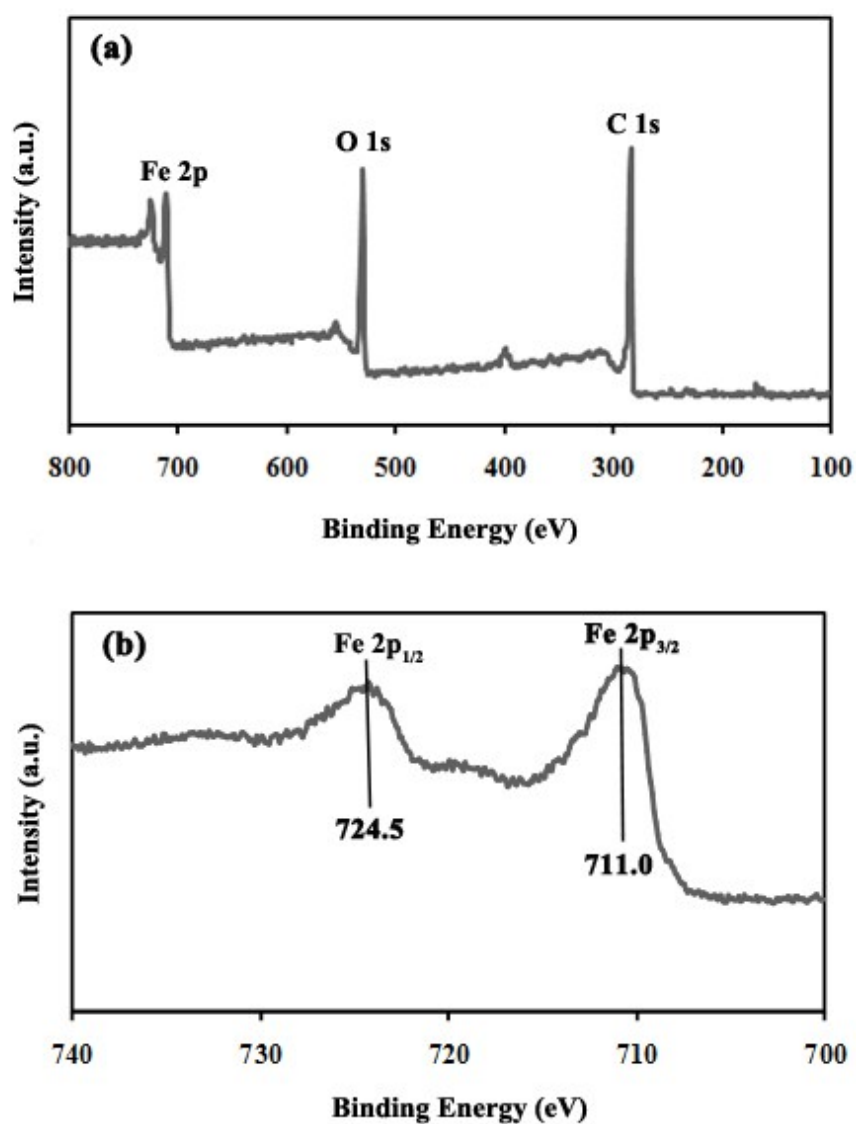

**Fig. S2** XPS spectra of B-600: (a) survey spectrum of B-600, (b) Fe 2p of B-600.

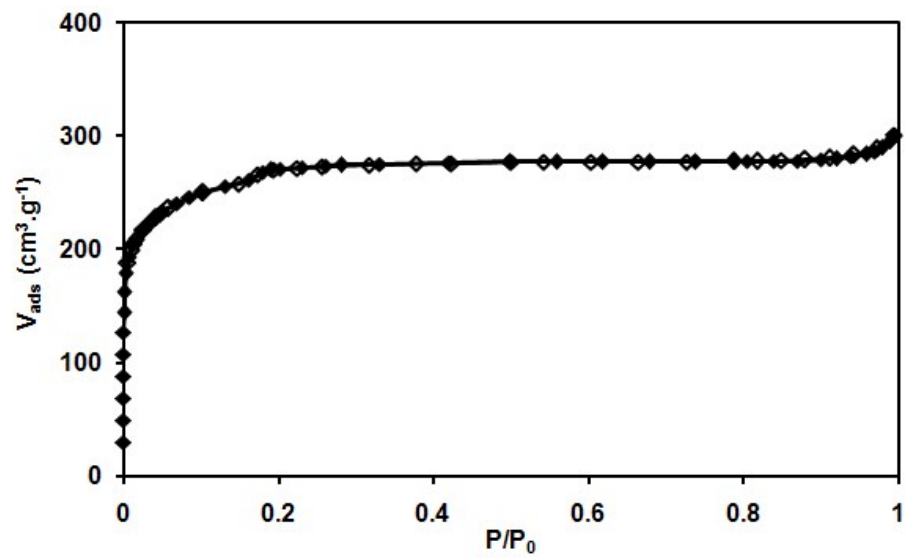

**Fig. S3** Nitrogen adsorption/desorption isotherms at 77 K of the as-synthesized MIL-88B.

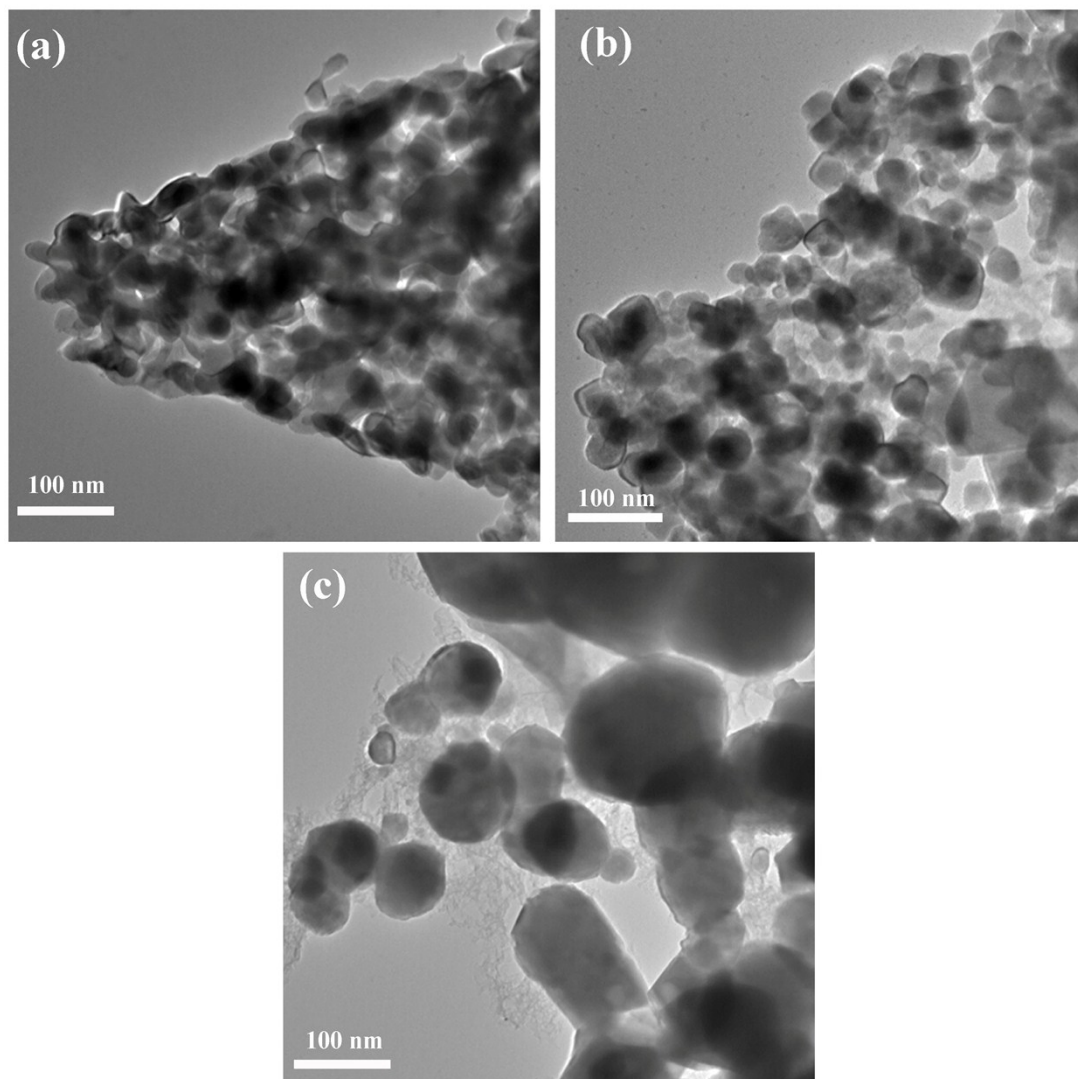

**Fig.S4** TEM images of (a) B-500, (b) B-700, and (c) B-800.

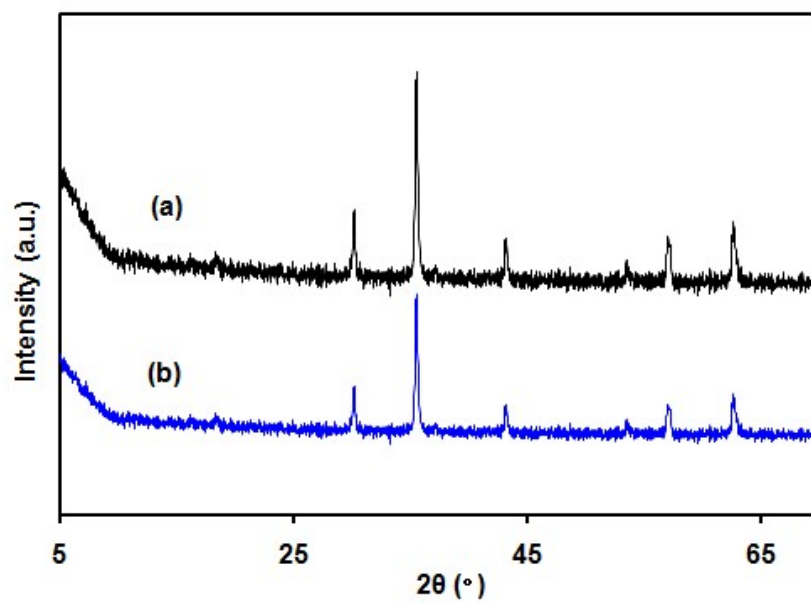

**Fig. S5** Powder XRD patterns for (a) B-600, (b) recycled B-600.

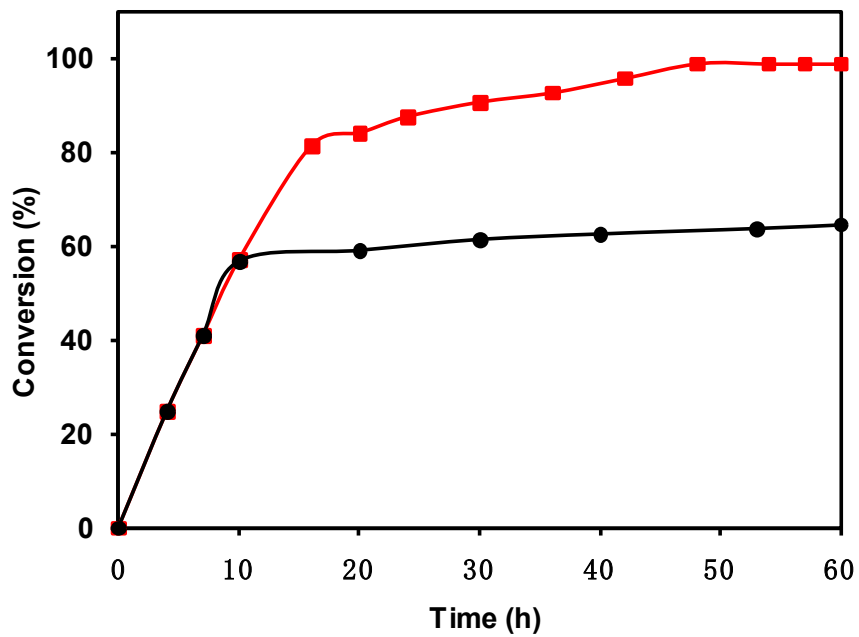

**Fig. S6** Conversion vs. time plot for the oxidation of benzyl alcohol. (■) with B-600 catalyst; (●) with filtrate. Reaction conditions: benzyl alcohol (0.5 mmol), B-600 (10 mol% Fe), H<sub>2</sub>O (3 mL), H<sub>2</sub>O<sub>2</sub> (1.5 mmol), 110 °C, total reaction time: 60 h.
